# Supplementary material for: Physical and Behavioral Factors Associated With Improvement in Physical Health and Function Among US Women During Midlife
Source: PubMed Central journal article supplement (PMC10152304; doi:10.1001/jamanetworkopen.2023.11012), 2023-05-01
Supplement: jamanetwopen-e2311012-s001.pdf [file jamanetwopen-e2311012-s001.pdf]

## Supplementary Online Content

Santacroce LM, Avis NE, Colvin AB, Ruppert K, Karvonen-Gutierrez C, Solomon DH. Physical and behavioral factors associated with improvement in physical health and function among US women during midlife. *JAMA Netw Open*. 2023;6(5):e2311012. doi:10.1001/jamanetworkopen.2023.11012

**eTable 1.** Characteristics of Included Cohort and Excluded Cohort at SWAN Baseline

**eTable 2.** Change in Select Covariates From Visit 8 to 10

**eTable 3.** Logistic Regression Model Without Baseline PCS

**eTable 4.** Primary Logistic Model Predicting Odds of PCS Improvement With Baseline PCS Interaction Terms

**eTable 5.** Interaction Odds Ratios for PCS Improvement at Different Levels of Baseline PCS for Osteoarthritis and Physical Activity

**eFigure.** Select Covariates Over Time Stratified by Different Tertiles of Baseline PCS

This supplementary material has been provided by the authors to give readers additional information about their work.

**eTable 1.** Characteristics of Included Cohort and Excluded Cohort at SWAN Baseline

| Characteristic at SWAN Baseline (Visit 0)       | Included Cohort<br>(N = 1,807) | Excluded Cohort<br>(N = 1,495) |
|-------------------------------------------------|--------------------------------|--------------------------------|
|                                                 | Patients, No. (%)              |                                |
| Age, mean (SD), y                               | 46.42 (2.66)                   | 46.23 (2.72)                   |
| Body Mass Index (kg/m <sup>2</sup> ), mean (SD) | 28 (7)                         | 29 (7)                         |
| Number of Medications, median (Q1, Q3)          | 0.0 (0.0, 2.0)                 | 0.0 (0.0, 2.0)                 |
| Number of Comorbidities, median (Q1, Q3)        | 0.0 (0.0, 1.0)                 | 1.0 (0.0, 1.0)                 |
| Physical Activity Score (range 1-5), mean (SD)  | 2.72 (1.03)                    | 2.44 (1.00)                    |
| Race/Ethnicity                                  |                                |                                |
| Black                                           | 493 (27)                       | 441 (29)                       |
| Chinese                                         | 193 (11)                       | 57 (3.8)                       |
| Japanese                                        | 223 (12)                       | 58 (3.9)                       |
| White                                           | 898 (50)                       | 653 (44)                       |
| Hispanic                                        | 0 (0)                          | 286 (19)                       |
| Less than College Education                     | 911 (50)                       | 959 (64)                       |
| Alcohol Use, No./Total No. (%)                  |                                |                                |
| <1/week                                         | 153/1723 (8.9)                 | 173/1410 (12)                  |
| >7/week 1-7/week                                | 445/1723 (26)                  | 368/1410 (26)                  |
| >7/week                                         | 272/1723 (16)                  | 169/1410 (12)                  |
| None                                            | 853/1723 (50)                  | 700/1410 (50)                  |
| Smoking Status                                  |                                |                                |
| Current                                         | 231 (13)                       | 349 (23)                       |
| Never Smoked                                    | 1,107 (61)                     | 783 (52)                       |
| Past Only                                       | 467 (26)                       | 363 (24)                       |
| Menopause Status                                |                                |                                |
| Early Perimenopausal                            | 801 (44)                       | 700 (47)                       |
| Premenopausal                                   | 997 (55)                       | 773 (52)                       |
| Unknown, hormone therapy                        | 3 (0.2)                        | 3 (0.2)                        |
| Financial Strain <sup>A</sup>                   |                                |                                |
| Sleeping Disturbance <sup>B</sup>               | 529 (29)                       | 492 (33)                       |
| Diabetes                                        | 79 (4.4)                       | 84 (5.6)                       |
| Hyperlipidemia                                  | 327 (18)                       | 287 (19)                       |
| Hypertension                                    | 313 (17)                       | 329 (22)                       |
| CVD                                             | 33 (1.8)                       | 62 (4.1)                       |
| Osteoarthritis                                  | 282 (16)                       | 278 (19)                       |
| Osteoporosis                                    | 25 (1.4)                       | 15 (1.0)                       |
| Thyroid Disease                                 | 190 (11)                       | 150 (10)                       |
| Cancer                                          | 36 (2.0)                       | 29 (2.0)                       |
| Depressive Symptoms <sup>C</sup>                | 375 (21)                       | 429 (29)                       |
| Common Problems/Symptoms                        |                                |                                |
| Cold sweats                                     | 28 (1.6)                       | 54 (3.7)                       |
| Night sweats                                    | 97 (5.4)                       | 121 (8.1)                      |
| Vaginal dryness                                 | 86 (4.8)                       | 89 (6.0)                       |

|                       |           |           |
|-----------------------|-----------|-----------|
| Feeling blue          | 203 (11)  | 205 (14)  |
| Dizzy spells          | 26 (1.4)  | 58 (3.9)  |
| Forgetfulness         | 288 (16)  | 312 (21)  |
| Mood changes          | 187 (10)  | 192 (13)  |
| Heart racing/pounding | 85 (4.7)  | 104 (7.0) |
| Fearful for no reason | 61 (3.4)  | 87 (5.9)  |
| Headaches             | 181 (10)  | 206 (14)  |
| Hot flashes           | 125 (6.9) | 129 (8.7) |
| Stiffness             | 500 (28)  | 449 (30)  |

Notes: Abbreviations: CVD, cardiovascular disease. A. Financial strain was defined as having a “somewhat hard” or “very hard” time paying for basics such as food, housing, medical care, and heating. B. Sleeping disturbance was defined as at least 3 or more nights per week of difficulty initiating sleep, difficulty remaining asleep, or early morning awakenings. C. Depressive symptoms defined as CES-D (Center for Epidemiologic Studies-Depression)  $\geq 16$ .

**eTable 2.** Change in Select Covariates From Visit 8 to 10

| Characteristic                                  | PCS Improvers<br>(N = 265) |             |             | PCS Non-Improvers<br>(N = 1,542) |            |             |
|-------------------------------------------------|----------------------------|-------------|-------------|----------------------------------|------------|-------------|
|                                                 | Visit 8                    | Visit 10    | Change      | Visit 8                          | Visit 10   | Change      |
|                                                 | Patients, No. (%)          |             |             |                                  |            |             |
| Age, mean (SD)                                  | 54.4 (2.7)                 | 56.4 (2.7)  | 2.0 (0.2)   | 54.5 (2.7)                       | 56.5 (2.7) | 2.0 (0.2)   |
| Physical Component Score, mean (SD)             | 41.7 (9.3)                 | 47.8 (10.0) | 6.2 (8.6)   | 52.1 (7.9)                       | 50.7 (8.8) | -1.47 (6.7) |
| Body Mass Index (kg/m <sup>2</sup> ), mean (SD) | 28.9 (8.1)                 | 28.7 (7.8)  | -0.18 (2.2) | 28.7 (7.3)                       | 28.9 (7.3) | 0.24 (2.0)  |
| Number of Medications, median (Q3, Q3)          | 2 (1, 4)                   | 2 (1, 5)    | 0 (-1, 1)   | 1 (0, 3)                         | 2 (0, 4)   | 0 (0, 1)    |
| Physical Activity Score, mean (SD) <sup>A</sup> | 2.6 (1.0)                  | 2.7 (1.0)   | 0.02 (0.8)  | 2.7 (1.0)                        | 2.8 (1.0)  | 0.01 (0.8)  |
| Financial Strain                                | 69 (26)                    | 68 (26)     | -1 (0.4)    | 364 (24)                         | 368 (24)   | 4 (0.2)     |
| Sleep Disturbance                               | 127 (48)                   | 117 (44)    | -10 (4)     | 675 (44)                         | 651 (42)   | -24 (2)     |
| Common Symptoms/Problems                        |                            |             |             |                                  |            |             |
| Back aches/pain                                 | 106 (40)                   | 89 (35)     | -17 (6)     | 338 (22)                         | 368 (24)   | 30 (2)      |
| Cold sweats                                     | 13 (5)                     | 11 (4)      | -2 (1)      | 51 (3.3)                         | 49 (3.2)   | -2 (0.1)    |
| Night sweats                                    | 37 (14)                    | 29 (11)     | -8 (3)      | 215 (14)                         | 200 (13)   | -15 (1)     |
| Vaginal dryness                                 | 45 (17)                    | 53 (20)     | 8 (3)       | 226 (15)                         | 260 (17)   | 34 (2)      |
| Feeling blue                                    | 33 (12)                    | 32 (12)     | -1 (0.4)    | 172 (11)                         | 155 (10)   | -17 (1)     |
| Dizzy spells                                    | 11 (4.2)                   | 10 (3.9)    | -1 (0.4)    | 30 (2)                           | 34 (2)     | 4 (0.2)     |
| Forgetfulness                                   | 73 (28)                    | 60 (23)     | -13 (5)     | 307 (20)                         | 309 (20)   | 2 (0.1)     |
| Mood changes                                    | 26 (10)                    | 20 (7)      | -6 (2)      | 111 (7)                          | 101 (6)    | -10 (1)     |
| Heart racing/pounding                           | 18 (7)                     | 17 (7)      | -1 (0.4)    | 69 (4)                           | 61 (4)     | -8 (0.5)    |
| Fearful for no reason                           | 5 (2)                      | 8 (3)       | 3 (1)       | 33 (2)                           | 42 (3)     | 9 (1)       |
| Headaches                                       | 29 (11)                    | 23 (9)      | -6 (1)      | 121 (8)                          | 115 (7)    | -6 (1)      |
| Breast pain                                     | 11 (4.2)                   | 9 (3.5)     | -2 (0.7)    | 54 (4)                           | 49 (3)     | -5 (1)      |
| Hot flashes                                     | 74 (28)                    | 66 (25)     | -8 (3)      | 395 (26)                         | 336 (27)   | -59 (4)     |
| Stiffness                                       | 146 (55)                   | 126 (49)    | -20 (8)     | 558 (36)                         | 587 (38)   | 29 (2)      |
| Irritability                                    | 29 (11)                    | 20 (8)      | -9 (3)      | 176 (11)                         | 152 (10)   | -24 (1)     |
| Nervousness                                     | 30 (11)                    | 31 (12)     | 1 (0.4)     | 189 (12)                         | 165 (11)   | -24 (1)     |

Notes: A. Physical activity available at Visit 6 and 9, not 8 and 10. Comorbidities not included in this table because they can only increase, not decrease due to the fact they are asked as an “ever” question.

**eTable 3.** Logistic Regression Model Without Baseline PCS

| Characteristic at Visit 8 | Model without baseline PCS |
|---------------------------|----------------------------|
|                           | OR (95% CI)                |
| Age                       | 0.98 (0.93-1.03)           |
| No sleep disturbance      | 0.92 (0.70-1.20)           |
| No financial strain       | 0.99 (0.73-1.36)           |
| No osteoarthritis         | 0.70 (0.53-0.93)           |
| Physical Activity         | 0.88 (0.77-1.01)           |
| BMI                       | 0.99 (0.97-1.01)           |
| Number of medications     | 1.05 (1.00-1.10)           |

Notes: Abbreviations: PCS, Physical Component Score; BMI, Body Mass Index.

**eTable 4.** Primary Logistic Model Predicting Odds of PCS Improvement With Baseline PCS Interaction Terms

| Characteristic at Visit 8        | Model with PCS and interaction terms |         |
|----------------------------------|--------------------------------------|---------|
|                                  | OR (95% CI)                          | P-value |
| Age                              | 0.96 (0.90-1.01)                     | 0.13    |
| No sleep disturbance             | 1.48 (1.08-2.02)                     | 0.016   |
| No financial strain              | 1.59 (1.09-2.31)                     | 0.016   |
| No osteoarthritis                | *                                    | <0.001  |
| Physical Activity                | *                                    | 0.003   |
| BMI                              | 0.95 (0.93-0.97)                     | <0.001  |
| Number of medications            | 0.94 (0.89-0.99)                     | 0.044   |
| Baseline PCS                     | *                                    | <0.001  |
| Baseline PCS * No osteoarthritis | *                                    | <0.001  |
| Baseline PCS * Physical Activity | *                                    | 0.008   |

Notes: Abbreviations: BMI, Body Mass Index; PCS, Physical Component Score. Single odds ratio values not available for terms with interaction. Interaction terms with baseline PCS and all other variables evaluated in the primary model, osteoarthritis and physical activity were statistically significant and remained in model.

**eTable 5.** Interaction Odds Ratios for PCS Improvement at Different Levels of Baseline PCS for Osteoarthritis and Physical Activity

| Variable and Level                   | Odds Ratio (95% Confidence Interval) |
|--------------------------------------|--------------------------------------|
| No Osteoarthritis vs Osteoarthritis  |                                      |
| PCS of 40 at Visit 8                 | 2.25 (1.49-3.39)                     |
| PCS of 45 at Visit 8                 | 1.54 (1.10-2.15)                     |
| PCS of 50 at Visit 8                 | 1.06 (0.74-1.51)                     |
| 1 Unit Increase in Physical Activity |                                      |
| PCS of 40 at Visit 8                 | 1.36 (1.12-1.65)                     |
| PCS of 45 at Visit 8                 | 1.21 (1.03-1.42)                     |
| PCS of 50 at Visit 8                 | 1.08 (0.91-1.28)                     |

Notes: Abbreviations: PCS, Physical Component Score. Odds Ratios generated for several different levels of baseline PCS for both osteoarthritis and physical activity due to the interaction terms. PCS levels set at 40, 45, and 50.

**eFigure.** Select Covariates Over Time Stratified by Different Tertiles of Baseline PCS

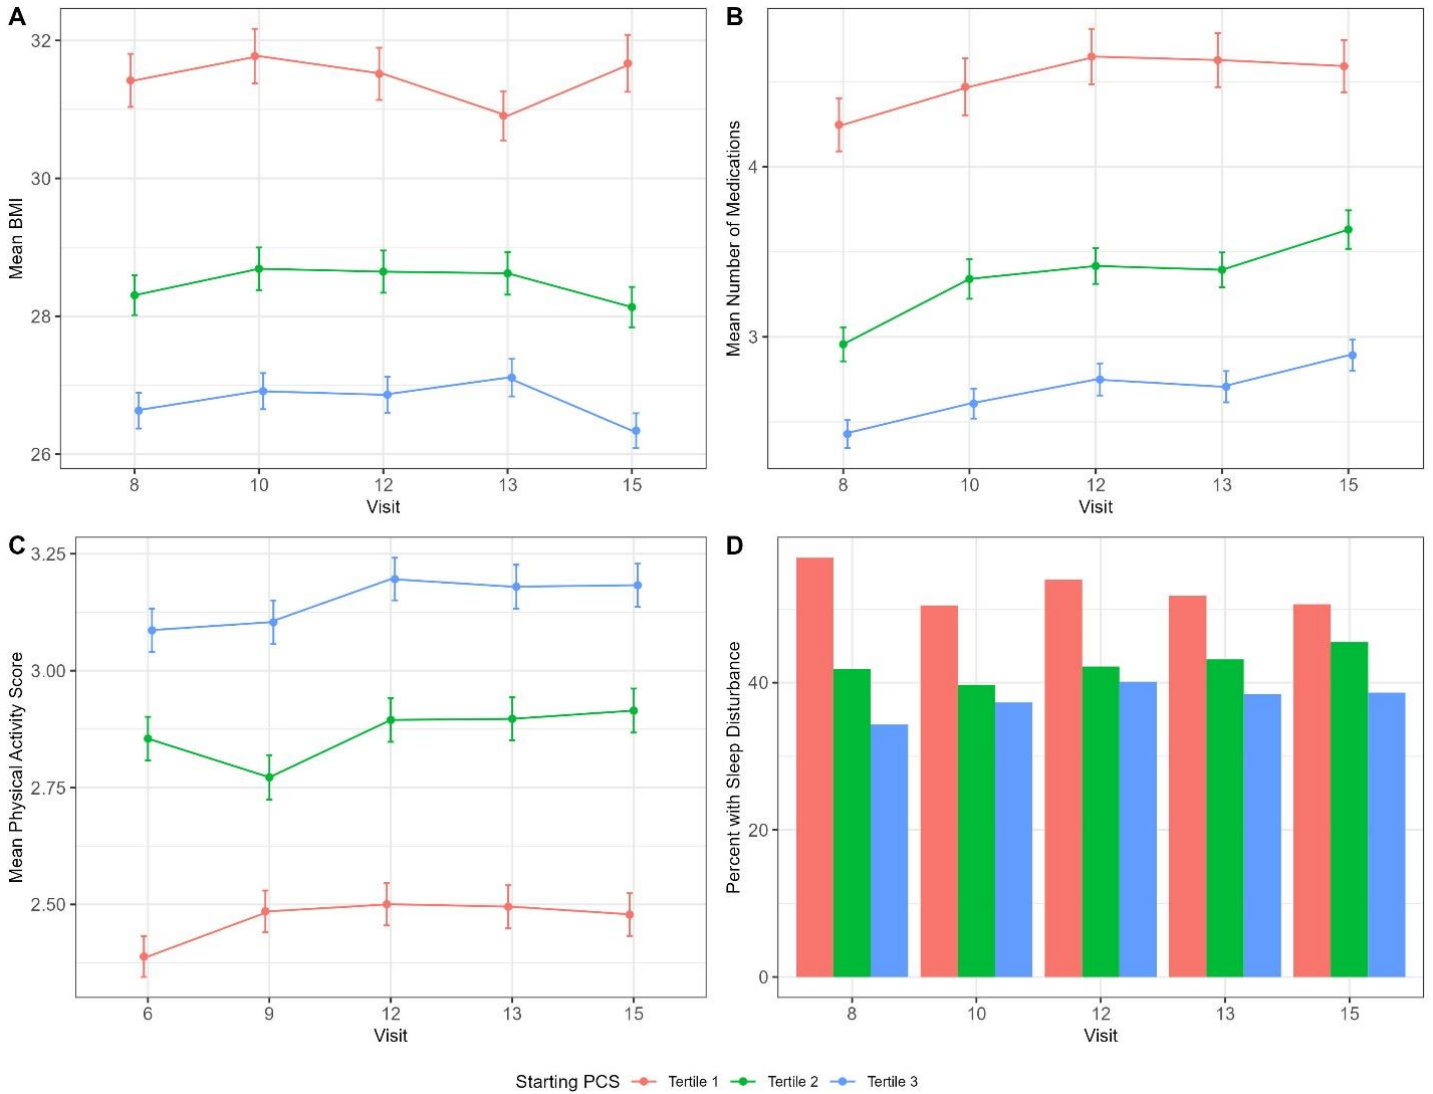

Legend: This figure demonstrates how four covariates change over time stratified by different tertiles of PCS at visit 8. The variables graphed are Physical Activity Score, Number of Medications Body Mass Index (BMI), and Sleep Disturbance. Continuous variables (BMI, number of medications, physical activity) are represented by the mean and standard deviation while binary variables (Sleep disturbance) are represented by percentages.
